# Supplementary material for: A novel surfactant aided micellar system of oxidation inhibitors in clotrimazole bioadhesive gel: development, characterization, in vitro and in vivo antifungal evaluation against Candida clinical isolates
Source: Royal Society of Chemistry journal article supplement (doi:10.1039/c4ra06914e), 2014-01-01
Supplement: c4ra06914e1.pdf [file c4ra06914e1.pdf]

**S1** *In vitro* release rate profile with model kinetics.

| Formulation | Zero order |       | First order |          | Higuchi |       | Peppas |       |
|-------------|------------|-------|-------------|----------|---------|-------|--------|-------|
|             | $R^2$      | $K$   | $R^2$       | $K$      | $R^2$   | $K$   | $R^2$  | $n$   |
| CA-1S       | 0.998      | 0.222 | 0.711       | 0.001303 | 0.929   | 4.546 | 0.992  | 0.325 |
| CA-2S       | 0.998      | 0.235 | 0.699       | 0.001302 | 0.930   | 4.805 | 0.994  | 0.328 |
| CA-3S       | 0.996      | 0.252 | 0.665       | 0.001302 | 0.937   | 5.186 | 0.995  | 0.330 |
| CT-1S       | 0.998      | 0.223 | 0.710       | 0.001303 | 0.929   | 4.559 | 0.992  | 0.325 |
| CT-2S       | 0.998      | 0.236 | 0.698       | 0.001303 | 0.914   | 10.05 | 0.994  | 0.328 |
| CT-3S       | 0.991      | 0.248 | 0.705       | 0.006513 | 0.909   | 10.38 | 0.994  | 0.330 |
| CAT-1S      | 0.996      | 0.225 | 0.661       | 0.001303 | 0.911   | 10.53 | 0.995  | 0.331 |
| CAT-2S      | 0.998      | 0.237 | 0.695       | 0.001303 | 0.931   | 4.860 | 0.994  | 0.328 |
| CAT-3S      | 0.956      | 0.231 | 0.506       | 0.001303 | 0.986   | 4.637 | 0.972  | 0.326 |
| CA-1C       | 0.998      | 0.215 | 0.632       | 0.001737 | 0.918   | 4.371 | 0.985  | 0.324 |
| CA-2C       | 0.998      | 0.220 | 0.728       | 0.001303 | 0.916   | 9.674 | 0.988  | 0.324 |
| CA-3C       | 0.997      | 0.224 | 0.698       | 0.001303 | 0.928   | 4.583 | 0.993  | 0.323 |
| CT-1C       | 0.998      | 0.216 | 0.737       | 0.001303 | 0.918   | 4.393 | 0.986  | 0.324 |
| CT-2C       | 0.998      | 0.221 | 0.727       | 0.001303 | 0.921   | 4.495 | 0.989  | 0.325 |
| CT-3C       | 0.997      | 0.225 | 0.695       | 0.001303 | 0.912   | 9.863 | 0.993  | 0.323 |
| CAT-1C      | 0.997      | 0.217 | 0.712       | 0.001303 | 0.913   | 9.649 | 0.992  | 0.322 |
| CAT-2C      | 0.998      | 0.220 | 0.715       | 0.001303 | 0.923   | 4.486 | 0.991  | 0.323 |
| CAT-3C      | 0.997      | 0.227 | 0.693       | 0.001303 | 0.929   | 4.637 | 0.994  | 0.324 |
| CA-1X       | 0.997      | 0.230 | 0.683       | 0.001303 | 0.912   | 9.962 | 0.995  | 0.356 |
| CA-2X       | 0.997      | 0.237 | 0.682       | 0.001303 | 0.713   | 45.17 | 0.995  | 0.327 |
| CA-3X       | 0.995      | 0.250 | 0.655       | 0.001303 | 0.706   | 47.01 | 0.996  | 0.330 |
| CT-1X       | 0.997      | 0.230 | 0.715       | 0.006947 | 0.912   | 9.971 | 0.995  | 0.325 |
| CT-2X       | 0.997      | 0.237 | 0.712       | 0.006513 | 0.663   | 33.01 | 0.995  | 0.327 |
| CT-3X       | 0.995      | 0.250 | 0.796       | 0.006513 | 0.911   | 10.43 | 0.995  | 0.330 |
| CAT-1X      | 0.997      | 0.231 | 0.678       | 0.001303 | 0.935   | 4.750 | 0.995  | 0.325 |
| CAT-2X      | 0.997      | 0.238 | 0.678       | 0.001303 | 0.911   | 10.15 | 0.995  | 0.327 |
| CAT-3X      | 0.995      | 0.252 | 0.653       | 0.001303 | 0.942   | 5.207 | 0.995  | 0.330 |
| PLAIN       | 0.997      | 0.161 | 0.730       | 0.001303 | 0.946   | 3.324 | 0.984  | 0.307 |

CA= CLZ+BHA; CT= CLZ+BHT; CAT= CLZ+BHA+BHT; S= SDS; C= CTAB; X= TX100
